# Supplementary material
Source: publisher site journal article supplement (https://www.spandidos-publications.com/855/downloadSupplementary)

Figure S1. Cumulative incidence rate of pancreatic tumor in KPC mice in our preliminary experiment.

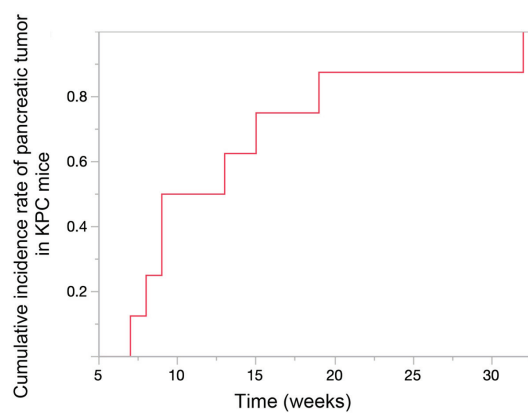

Figure S2. Representative images of immunohistochemistry with GFP, Ly6G and F4/80 in the experimental liver micrometastases at days 1-3. Scale bar, 100  $\mu\text{m}$ .

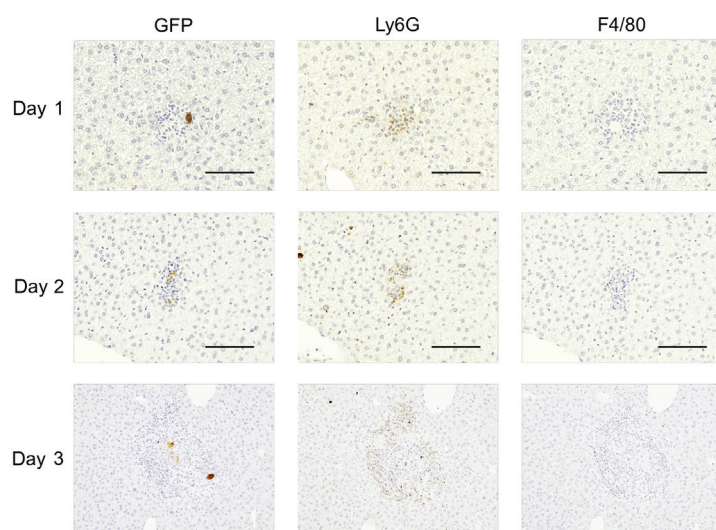

Figure S3. Effect of DNase I on the viability of pancreatic cancer cells (PCCs; PCC1; top panel) and human hepatic stellate cells (HSCs; bottom panel) measured by cell proliferation assay. Data shown represent the means  $\pm$  SD.

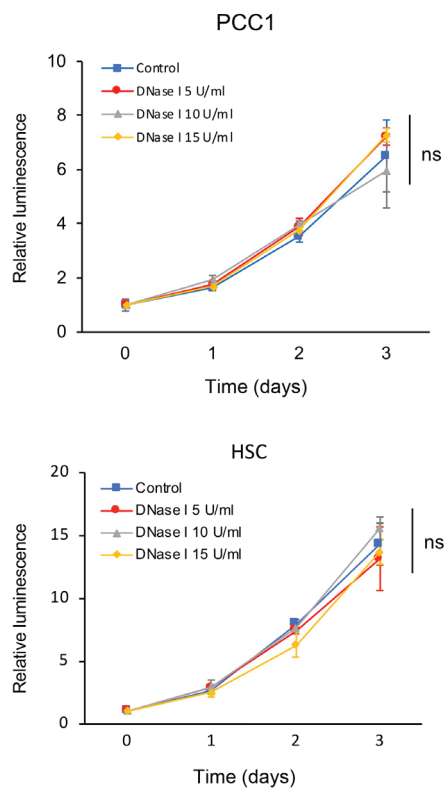

Figure S4. Expression levels of Acta2 and Col1A1 in HSCs with or without neutrophils and cancer cells. Data shown represent the means  $\pm$  SD.

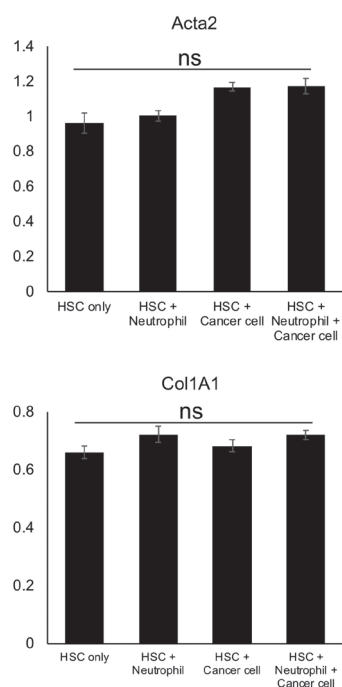

Supplement: Supplementary file 1 [file downloadSupplementary]
